# Supplementary material for: A proposal for a multivariate quantitative approach to infer karyological relationships among taxa
Source: Comp Cytogenet. 2014 Dec 10;8(4):337–49. doi: 10.3897/CompCytogen.v8i4.8564 (PMC4296720; doi:10.3897/CompCytogen.v8i4.8564)
Supplement: Supplementary material 1 — Karyological parameters available for the studied taxa [file CompCytogen-8-337-s001.xls]

## Sheet: Liliaceae+Smilacaceae
Liliaceae and Smilacaceae
Species	CVCL	CVCI	MCA	THL	x	2n	Family	Tribe	Reference
Erythronium dens-canis L.	38.39	27.68	59.4007	96.44	12	24	Liliaceae	Tulipeae	Capineri et al., 1978
Erythronium japonicum Decne.	24.42	29.73	52.6747	117.54	12	24	Liliaceae	Tulipeae	Utech and Kawano, 1976
Erythronium japonicum Decne.	28.18	26.37	42.6148	79.02	12	24	Liliaceae	Tulipeae	Sato, 1943
Tulipa armena Boiss.	28.45	29.03	37.6664	57.27	12	24	Liliaceae	Tulipeae	Newton, 1925
Tulipa australis Link	29.87	20.18	52.553	100.49	12	24	Liliaceae	Tulipeae	Garbari and Tornadore 1970
	30.08	23.63	51.3474	83.72	12	24	Liliaceae	Tulipeae	Blakey and Vosa, 1980
	25.27	20.21	50.8629	68.64	12	24	Liliaceae	Tulipeae	Scrugli et al., 1980
	15.27	18.09	45.9966	61.07	12	24	Liliaceae	Tulipeae	Başak et al., 1997
(sub T. celsiana)	27.16	18.66	46.9516	88.31	12	24	Liliaceae	Tulipeae	Blakey and Vosa, 1980
	26.73	16.7	47.8611	45.39	12	24	Liliaceae	Tulipeae	Southern, 1967
Tulipa biflora Pall.	19.84	19.67	56.418	213.15	12	24	Liliaceae	Tulipeae	Sheidai et al., 2002
Tulipa clusiana DC.	26.3229	26.0089	62.1006	80.3032	12	48	Liliaceae	Tulipeae	Wafai and Koul, 1986
	43.3952	27.2206	68.0471	78.5416	12	60	Liliaceae	Tulipeae	Wafai and Koul, 1986
(sub T. aitchisonii)	28.5912	22.1919	67.8277	92.8718	12	24	Liliaceae	Tulipeae	Wafai and Koul, 1986
Tulipa greigii Regel	30.65	24.79	47.4889	48.94	12	24	Liliaceae	Tulipeae	Newton, 1925
Tulipa hoogiana B. Fedtsch.	12.4	20.37	58.4726	181.72	12	24	Liliaceae	Tulipeae	Sheidai et al., 2002
Tulipa humilis Herb.	21.98	20.81	60.0571	190.52	12	24	Liliaceae	Tulipeae	Sheidai et al., 2002
	14.05	26.35	52.9475	157.12	12	24	Liliaceae	Tulipeae	Sheidai et al., 2002
Tulipa kolpakowskiana Regel	8.88	20.81	59.7986	37.24	12	24	Liliaceae	Tulipeae	Newton, 1925
Tulipa linifolia Regel	38.78	30.93	63.8202	33.4	12	24	Liliaceae	Tulipeae	Newton, 1925
(sub T. batalini)	35.53	32.07	66.9274	31.48	12	24	Liliaceae	Tulipeae	Newton, 1925
Tulipa montana Lindl.	39.23	25.94	69.7611	136.73	12	24	Liliaceae	Tulipeae	Sheidai et al., 2002
Tulipa montana var. chrysantha (Boiss.) Wendelbo	21.99	29.03	69.1421	145.57	12	24	Liliaceae	Tulipeae	Sheidai et al., 2002
Tulipa orphanidea Boiss.	33.85	17.99	49.001	50.93	12	24	Liliaceae	Tulipeae	Southern, 1967
	37.02	24.8	53.4195	84.59	12	24	Liliaceae	Tulipeae	Blakey and Vosa, 1980
	17.16	33.89	43.459	54.93	12	24	Liliaceae	Tulipeae	Newton, 1925
(sub T. hageri)	34.46	22.01	52.2928	88.7	12	24	Liliaceae	Tulipeae	Blakey and Vosa, 1980
(sub T. hageri)	22.16	19.39	45.9514	66.88	12	36	Liliaceae	Tulipeae	Başak et al., 1997
(sub T. hellespontica)	24.02	15.16	43.0008	56.26	12	48	Liliaceae	Tulipeae	Başak et al., 1997
(sub T. thracica)	27.37	23.96	44.9643	52.89	12	36	Liliaceae	Tulipeae	Başak et al., 1997
(sub T. whittalli)	32.31	19.57	52.3121	52.07	12	48	Liliaceae	Tulipeae	Southern, 1967
(sub T. whittalli)	34.06	26.37	50.7477	83.66	12	24	Liliaceae	Tulipeae	Blakey and Vosa, 1980
Tulipa primulina Baker	18.56	23.01	45.0539	58.96	12	24	Liliaceae	Tulipeae	Newton, 1925
Tulipa sogdiana Bunge	21.36	26.64	57.1399	174.08	12	24	Liliaceae	Tulipeae	Sheidai et al., 2002
Tulipa stellata Hook.	46.82	26.75	69.2061	77.14	12	48	Liliaceae	Tulipeae	Koul, 1988
	36.7915	24.8286	62.4266	94.505	12	36	Liliaceae	Tulipeae	Wafai and Koul, 1986
	36.319	26.9236	57.0635	72.1738	12	48	Liliaceae	Tulipeae	Wafai and Koul, 1986
(sub T. clusiana var. chrysantha)	53.0451	30.9418	74.4813	88.77	12	24	Liliaceae	Tulipeae	Wafai and Koul, 1986
Tulipa sylvestris L.	25.96	20.47	52.9365	174.67	12	48	Liliaceae	Tulipeae	Cesca, 1984
Tulipa systola Stapf	10.9	20.31	62.7451	197.92	12	24	Liliaceae	Tulipeae	Sheidai et al., 2002
	17.76	21	60.7284	191.4	12	24	Liliaceae	Tulipeae	Sheidai et al., 2002
Tulipa tarda Stapf	34.52	21.8	53.6071	52.55	12	24	Liliaceae	Tulipeae	Southern, 1967
Tulipa turkestanica (Regel) Regel	31.49	18.57	54.0104	53.91	12	48	Liliaceae	Tulipeae	Southern, 1967
Tulipa undulatifolia Boiss.	18.85	19.86	45.5433	65.82	12	24	Liliaceae	Tulipeae	Başak et al., 1997
Tulipa urumiensis Stapf	29.58	21.67	42.0897	86.02	12	24	Liliaceae	Tulipeae	Blakey and Vosa, 1980
Amana latifolia (Makino) Honda	27.83	17.43	58.5357	70.47	12	24	Liliaceae	Tulipeae	Sato, 1943
Amana edulis (Miq.) Honda	25.26	35.56	38.3162	65.08	12	48	Liliaceae	Tulipeae	Sato, 1943
Gagea graeca (L) Irmisch	25.4	30.83	34.0273	25.56	12	24	Liliaceae	Tulipeae	Peruzzi et al., 2008
G. trinervia (Viv) Greuter	35.69	40.83	48.4667	38.73	12	24	Liliaceae	Tulipeae	Peruzzi et al., 2008
G. serotina (L) Rchb	51.26	30.07	36.1759	38.15	12	24	Liliaceae	Tulipeae	Sato, 1943
G. chlorantha (M.Bieb.) Schult. & Schult. f.	40.7261	28.6547	44.2122	33.7	12	24	Liliaceae	Tulipeae	Davlianidze, 1976
G. chanae Grossh.	36.752	34.449	41.1953	41.3	12	24	Liliaceae	Tulipeae	Davlianidze, 1976
G. helenae Grossh.	37.2443	32.2347	32.1086	40.3	12	24	Liliaceae	Tulipeae	Davlianidze, 1976
G. reverchoni Degen	56.45	33.26	54.3793	33.26	12	24	Liliaceae	Tulipeae	Peruzzi et al., 2009
G. lutea (L) Ker-Gawl	42.06	24.75	56.4086	46.02	12	24	Liliaceae	Tulipeae	Sopova et al., 1984
G. lutea (L) Ker-Gawl	49.16	28.64	53.3392	41.83	12	72	Liliaceae	Tulipeae	Sopova et al., 1984
G. charadzeae Davl.	39.4217	27.2859	26.9852	37.25	12	48	Liliaceae	Tulipeae	Davlianidze, 1976
G. germainae Grossh.	41.9212	30.7961	32.82	35.75	12	48	Liliaceae	Tulipeae	Davlianidze, 1976
G. cfr. paczoskii	42.57	34.48	48.5833	44.96	12	24	Liliaceae	Tulipeae	Peruzzi, 2012
G. pratensis (Pers) Dumort	38.43	23.42	49.4021	41.81	12	24	Liliaceae	Tulipeae	Sopova et al., 1984
G. pusilla (F W Schmidt) Sweet	39.61	30.03	42.746	39.29	12	24	Liliaceae	Tulipeae	Sopova et al., 1984
G. pusilla (F W Schmidt) Sweet	45.5	26.15	46.4106	30.82	12	48	Liliaceae	Tulipeae	Sopova et al., 1984
G. pusilla (F W Schmidt) Sweet	46.91	19.43	45.775	29.39	12	60	Liliaceae	Tulipeae	Sopova et al., 1984
G. tisoniana Peruzzi, Bartolucci, Frignani & Minutillo	37.41	38.84	44.4702	39.88	12	24	Liliaceae	Tulipeae	Peruzzi et al., 2007
G. bulbifera (Pall.) Salisb.	39.78	35.43	43.5216	46.1	12	24	Liliaceae	Tulipeae	Davlianidze, 1976
G. alexeenkoana Miscz.	36.0939	22.9903	45.2694	36.1	12	24	Liliaceae	Tulipeae	Davlianidze, 1976
G. caroly-kochii Grossh.	40.5812	28.5515	40.1204	31.5	12	24	Liliaceae	Tulipeae	Davlianidze, 1976
G. commutata K Koch (sub G. dayana var. conjungens)	30.9	31.84	42.5599	67.37	12	24	Liliaceae	Tulipeae	Heyn & Dafni, 1971
G. reticulata (Pall) Schult & Schult f.	44.03	34.52	39.2084	62.52	12	24	Liliaceae	Tulipeae	Koul & Wakhlu, 1985
G. taurica Stev.	49.3786	26.8488	33.1231	44.9	12	24	Liliaceae	Tulipeae	Davlianidze, 1976
G. tenuifolia (Boiss.) Fom.	34.73	37.14	42.9499	36.9	12	24	Liliaceae	Tulipeae	Davlianidze, 1976
G. rigida Boiss. & Spruner	36.98	39.04	53.7995	28.16	12	24	Liliaceae	Tulipeae	Peruzzi et al., 2009
G. rigida Boiss. & Spruner (sub G. fibrosa (Desf.) Schult & Schult f.)	38.67	37.91	38.1734	66.07	12	24	Liliaceae	Tulipeae	Heyn & Dafni, 1971
G. commutata K. Koch	44.51	33.96	37.3597	61.04	12	24	Liliaceae	Tulipeae	Heyn & Dafni, 1971
G. sarmentosa K Koch (sub G. commutata)	38.37	30.28	35.1435	36.7	12	24	Liliaceae	Tulipeae	Davlianidze, 1976
G. confusa A. Terracc.	46.5069	30.3605	37.287	32.33	12	36	Liliaceae	Tulipeae	Davlianidze, 1976
G. minima (L) Ker-Gawl	41.1	28.83	36.8478	30.7	12	24	Liliaceae	Tulipeae	Peruzzi & Aquaro, 2005
G. minima (L) Ker-Gawl	44.38	23.57	51.4881	46.44	12	24	Liliaceae	Tulipeae	Sopova et al., 1984
G. peruzzii J.-M.Tison	35.17	28.02	26.7247	22.44	12	48	Liliaceae	Tulipeae	Peruzzi, 2003
G. bohemica (Zauschn) Schult & Schult f	32.5	26.37	23.4122	21.8	12	48	Liliaceae	Tulipeae	Peruzzi, 2008
G. bohemica (Zauschn) Schult & Schult f	52.07	16.73	51.2249	34.21	12	48	Liliaceae	Tulipeae	Sopova et al., 1984
G. bohemica (Zauschn) Schult & Schult f	37.93	29.12	35.4784	24.22	12	72	Liliaceae	Tulipeae	Peruzzi, 2008
G. peduncularis (J & C Presl) Pascher	39.51	38.26	38.7154	32.42	12	36	Liliaceae	Tulipeae	Peruzzi & Caparelli, 2007
G. ramulosa A.Terracc.	34.3725	29.1555	32.0676	24.82	12	48	Liliaceae	Tulipeae	Peruzzi, 2008
G. dubia A Terracc	30.1905	24.6294	43.9874	36.65	12	48	Liliaceae	Tulipeae	Davlianidze, 1976
G. chaberti A Terracc	34.22	34.66	35.4626	31.78	12	36	Liliaceae	Tulipeae	Peruzzi, 2008
G. dureiui Parl	34.8	31.33	40.2893	53.01	12	36	Liliaceae	Tulipeae	Corsi et al., 1996
G. dureiui Parl	38.16	37.54	36.1727	46.3	12	24	Liliaceae	Tulipeae	Ruiz-Rejon, 1978
G. dureiui Parl	33.94	31.01	38.2347	42.14	12	36	Liliaceae	Tulipeae	Ruiz-Rejon, 1978
G. foliosa (J & C Presl) Schult & Schult f	34.47	32.17	33.7879	30.14	12	36	Liliaceae	Tulipeae	Peruzzi, 2008
G. granatellii (Parl) Parl	32.06	35.23	38.6688	30.46	12	36	Liliaceae	Tulipeae	Peruzzi, 2008
G. granatellii (Parl) Parl	35.5805	29.058	37.7676	28.68	12	36	Liliaceae	Tulipeae	Peruzzi, 2008
G. lacaitae A.Terracc.	32.86	33.87	35.497	32.3	12	36	Liliaceae	Tulipeae	Peruzzi, 2012
G. apulica Peruzzi & J.-M.Tison	32.67	33.34	41.9671	44.62	12	36	Liliaceae	Tulipeae	Peruzzi & Aquaro, 2005
G. apulica Peruzzi & J.-M.Tison	35.63	38.19	40.2539	42.69	12	36	Liliaceae	Tulipeae	Peruzzi, 2008
G. soleirolii F W Schultz	45.35	46.06	48.0053	51.42	12	36	Liliaceae	Tulipeae	Martinoli, 1950
G. villosa (M Bieb) Sweet	36.25	34.35	29.3007	45.46	12	48	Liliaceae	Tulipeae	Reynaud et al., 1993
G. villosa (M Bieb) Sweet	47.63	35.77	47.3794	41.44	12	48	Liliaceae	Tulipeae	Peruzzi et al., 2009
G. fragifera (Vill) Ehr Bayer & G. Lopez	41.35	35.1	42.6429	47.11	12	48	Liliaceae	Tulipeae	Sopova et al., 1984
G. glacialis C. Koch	26.9239	26.2352	22.4405	29.6	12	48	Liliaceae	Tulipeae	Davlianidze, 1976
G. sulfurea Miscz.	37.3218	30.305	20.7544	32.83	12	60	Liliaceae	Tulipeae	Davlianidze, 1976
G. joannis Grossh.	37.3749	28.6144	40.9661	39	12	24	Liliaceae	Tulipeae	Davlianidze, 1976
G. anisanthos C. Koch	32.3694	24.1506	29.823	32.65	12	48	Liliaceae	Tulipeae	Davlianidze, 1976
G. lojaconoi Peruzzi	37.31	31.64	32.2029	24.94	12	36	Liliaceae	Tulipeae	Peruzzi, 2003
G. lojaconoi Peruzzi	36.47	25.03	36.6522	25	12	36	Liliaceae	Tulipeae	Peruzzi & Aquaro, 2005
G. sicula Lojac	38.31	33.18	38.69	35.82	12	24	Liliaceae	Tulipeae	Peruzzi, 2008
G. amblyopetala Boiss. & Heldr.	35.75	30.05	28.0565	25.61	12	36	Liliaceae	Tulipeae	Peruzzi, 2003
Fritillaria anhuiensis S. F. Chen & S. F. Yin	68.68	25.96	65.117	100.28	12	24	Liliaceae	Lilieae	Wang, 1992
	53.48	19.05	57.2575	213	12	24	Liliaceae	Lilieae	Xu et al., 1987
F. bithynica Baker	53.05	16.16	61.1188	196.6	12	24	Liliaceae	Lilieae	Zaharof, 1989a
	55.61	18.42	62.0123	182.98	12	24	Liliaceae	Lilieae	Kamari, 1996
F. carica Rix	65.69	17.47	65.7643	193.48	12	24	Liliaceae	Lilieae	Zaharof, 1989a
F. cirrhosa D. Don	75.83	20.29	68.5682	93.27	12	24	Liliaceae	Lilieae	Xie et al., 1992
	58.2293	26.1135	56.5518	113.848	12	24	Liliaceae	Lilieae	Mehra and Kachroo, 1951
(sub F. royley)	70.44	25.08	67.443	117.21	12	24	Liliaceae	Lilieae	Mehra and Sachdeva, 1976
F. eastwoodiae R. M. Macfarl. (sub F. phaeanthera)	48.78	20.7	58.3431	243.17	12	24	Liliaceae	Lilieae	Cave, 1970
(sub F. phaeanthera)	31.38	16.31	46.3172	196.09	12	36	Liliaceae	Lilieae	Cave, 1970
F. falcata (Jeps.) D. E. Beetle	58.77	16.8	59.9239	207.95	12	24	Liliaceae	Lilieae	Cave, 1970
F. graeca Boiss. & Spruner	62.41	16.54	65.3212	198.85	12	24	Liliaceae	Lilieae	Zaharof, 1989b
	60.4	15.35	65.3282	291.33	12	24	Liliaceae	Lilieae	Kamari, 1991
	47.09	19.28	55.3374	165.62	12	24	Liliaceae	Lilieae	La Cour, 1978
	46.76	17.87	62.9271	155.63	12	24	Liliaceae	Lilieae	Zaharof, 1989a
F. karelinii (Fisch.) Baker	75.55	19.71	65.4462	110.7	12	24	Liliaceae	Lilieae	Zhai and Liu, 1985
F. liliacea Lindl.	37.39	23.4	51.7501	202.28	12	24	Liliaceae	Lilieae	Cave, 1970
F. lusitanica Wikstr.	46.32	18.73	60.4007	144.2	12	24	Liliaceae	Lilieae	Fernandez-Arias Gonzalez and Devesa Alcaraz, 1990
(sub F. nervosa subsp. falcata)	35.23	20.16	56.2092	151.66	12	24	Liliaceae	Lilieae	Fernandez-Arias Gonzalez and Devesa Alcaraz, 1990
(subsp. F. stenophylla)	39.15	19.11	57.9852	197.81	12	24	Liliaceae	Lilieae	Fernandez-Arias Gonzalez and Devesa Alcaraz, 1990
F. macrandra Baker (sub F. rhodocanakis subsp. argolica)	58.5	26.36	61.0161	166.82	12	24	Liliaceae	Lilieae	Zaharof, 1989a
(sub F. rhodocanakis subsp. rhodokanakis)	64.11	27.05	65.5027	149.39	12	24	Liliaceae	Lilieae	Zaharof, 1989a
F. messanensis Raf.	53.87	20.66	66.8911	98.74	12	24	Liliaceae	Lilieae	Gori, 1958
	57.35	18.02	64.8209	101.98	12	24	Liliaceae	Lilieae	unpublished
	59.1	15.14	68.0273	192.29	12	24	Liliaceae	Lilieae	Kamari et al., 2006
	64.87	20.51	66.9341	180.85	12	24	Liliaceae	Lilieae	Kamari et al., 2006
	48.77	19.3	62.8117	136.24	12	24	Liliaceae	Lilieae	Kamari et al., 2006
("F. orsiniana Parl.")	42.6	24.57	55.7402	77.55	12	24	Liliaceae	Lilieae	Chichiriccò and Tammaro, 1982
F. monantha Migo (sub F. hupehensis)	54.81	21.25	58.7926	245.7	12	24	Liliaceae	Lilieae	Xu et al., 1987
(sub F. hupehensis)	70.81	25.88	67.5316	91.65	12	24	Liliaceae	Lilieae	Zhang et al., 1992
(sub F. hupehensis)	75.62	22.49	68.7431	99.92	12	24	Liliaceae	Lilieae	Zhang et al., 1992
(sub F. ningguonensis)	71.86	33.1	69.7584	100.01	12	24	Liliaceae	Lilieae	Zhang et al., 1992
(sub F. qimenensis)	70.81	23.44	70.5344	92.2	12	24	Liliaceae	Lilieae	Zhang et al., 1992
F. montana Hoppe	57.87	27.74	40.9732	117.2	9	18	Liliaceae	Lilieae	Altamura et al., 1984
	57.26	27.99	39.5043	200.89	9	18	Liliaceae	Lilieae	Zaharof, 1989a
	59.94	36.55	39.3656	245.47	9	18	Liliaceae	Lilieae	Cesca, 1984
	61.03	35.55	41.7069	230.65	9	27	Liliaceae	Lilieae	Cesca, 1984
F. mutabilis Kamari	61.1	21.15	65.9726	156.92	12	24	Liliaceae	Lilieae	Kamari, 1991
F. olgae Vved.	84.32	21.33	69.7056	109.1	12	24	Liliaceae	Lilieae	Zhai and Liu, 1985
F. pallidiflora Schrenk	70.03	21.89	68.4344	111.8	12	24	Liliaceae	Lilieae	Zhai and Liu, 1985
F. pelinaea Kamari	65.7	20.23	65.3471	149.97	12	24	Liliaceae	Lilieae	Kamari, 1996
F. persica L.	68.72	24.19	64.1888	161	12	24	Liliaceae	Lilieae	D'Arienzo and Mezzetti Bambacioni, 1967
F. pontica Wahlemb.	68.76	17.95	68.2204	218.74	12	24	Liliaceae	Lilieae	Zaharof, 1989a
	52.58	15.26	64.7823	168.01	12	24	Liliaceae	Lilieae	Başak, 1991
F. pyrenaica L. (sub F. nervosa subsp. nervosa)	57.92	19.4	61.5512	157.27	12	24	Liliaceae	Lilieae	Fernandez-Arias Gonzalez and Devesa Alcaraz, 1990
F. rhodia A. Hansen	53.35	17.18	59.9304	146.21	12	24	Liliaceae	Lilieae	Kamari, 1996
F. sewerzowii Regel	86.51	25.12	68.6912	182.8	12	24	Liliaceae	Lilieae	Baranova et al., 1981
F. stibrnyi Velen.	48.49	17.18	63.5665	135.15	12	24	Liliaceae	Lilieae	Başak, 1991
F. thessala (Boiss.) Kamari	70.18	15.98	65.5309	163.3	12	24	Liliaceae	Lilieae	Kamari, 1991
F. thunbergii Miq.	81.01	37	70.7163	119.45	12	24	Liliaceae	Lilieae	Zhai and Liu, 1985
	78.2	20.63	66.49	100.13	12	24	Liliaceae	Lilieae	Wang, 1992
	61.11	22.75	64.2373	100.27	12	24	Liliaceae	Lilieae	Wang, 1992
	65.75	26.03	65.5452	100	12	24	Liliaceae	Lilieae	Zhang et al., 1992
	56.95	21.52	56.527	203.88	12	24	Liliaceae	Lilieae	Xu et al., 1987
	71.77	23.27	68.2979	100.13	12	24	Liliaceae	Lilieae	Wang, 1992
(sub F. xiaobeimu)	67.93	23.17	66.8262	100.1	12	24	Liliaceae	Lilieae	Zhang et al., 1992
	51.59	26.62	60.1371	117.86	12	24	Liliaceae	Lilieae	Sato, 1943
F. verticillata Willd.	91.69	23.08	69.0672	113.7	12	24	Liliaceae	Lilieae	Zhai and Liu, 1985
F. walujevii Regel	78.53	24.18	72.068	112.3	12	24	Liliaceae	Lilieae	Zhai and Liu, 1985
F. cirrhosa D. Don	76.3889	24.1288	67.5612	124.823	12	24	Liliaceae	Lilieae	Gao et al., 2012
F. cirrhosa D. Don	64.5926	19.7942	64.9828	117.799	12	24	Liliaceae	Lilieae	Gao et al., 2012
F. cirrhosa D. Don	72.3999	21.0094	67.0016	120.231	12	24	Liliaceae	Lilieae	Gao et al., 2012
F. unibracteata P.K.Hsiao & K.C.Hsia	63.582	18.3637	64.7706	109.902	12	24	Liliaceae	Lilieae	Gao et al., 2012
F. unibracteata P.K.Hsiao & K.C.Hsia	81.9397	26.887	69.4783	126.947	12	24	Liliaceae	Lilieae	Gao et al., 2012
F. unibracteata P.K.Hsiao & K.C.Hsia	67.5788	20.2228	64.9617	122.661	12	24	Liliaceae	Lilieae	Gao et al., 2012
F. yuminensis X. Z. Duan	74.14	24.11	67.6195	111.35	12	24	Liliaceae	Lilieae	Zhai and Liu, 1985
Cardiocrinum cordatum (Thunb.) Makino	82.42	25.23	67.1796	124.78	12	24	Liliaceae	Lilieae	Chauhan and Brandham, 1985
(sub Lilium cordifolium)	71.58	25.05	71.7928	126.25	12	24	Liliaceae	Lilieae	Mehra and Sachdeva, 1976
	53.5	30.71	54.8696	82.66	12	24	Liliaceae	Lilieae	Sato, 1943
Cardiocrinum giganteum (Wall.) Makino	80.65	27.85	66.0374	97.72	12	24	Liliaceae	Lilieae	Shang et al., 1992
	86.86	29.46	69.7798	94.66	12	24	Liliaceae	Lilieae	Xie et al., 1992
	67.67	24.52	66.0306	108.03	12	24	Liliaceae	Lilieae	Chauhan and Brandham, 1985
	68.76	25.74	64.5678	184.47	12	24	Liliaceae	Lilieae	Hong and Zhu, 1987
(sub Lilium giganteum)	83.14	29.06	67.8607	226.36	12	24	Liliaceae	Lilieae	Stewart, 1947
Cardiocrinum cathayanum (E. H. Wilson) Stearn	81.3872	26.21	64.8334	111.457	12	24	Liliaceae	Lilieae	Gao et al., 2012
Cardiocrinum cathayanum (E. H. Wilson) Stearn	79.9994	28.1543	65.5646	116.48	12	24	Liliaceae	Lilieae	Gao et al., 2012
Cardiocrinum giganteum (Wallich) Makino	84.0828	25.4782	68.0363	142.135	12	24	Liliaceae	Lilieae	Gao et al., 2012
Cardiocrinum giganteum (Wallich) Makino	82.0256	26.2303	67.9366	131.99	12	24	Liliaceae	Lilieae	Gao et al., 2012
Cardiocrinum giganteum (Wallich) Makino	85.9663	29.2591	70.0224	118.272	12	24	Liliaceae	Lilieae	Gao et al., 2012
Cardiocrinum giganteum (Wallich) Makino	101.39	27.2928	72.8433	135.04	12	24	Liliaceae	Lilieae	Gao et al., 2012
Cardiocrinum giganteum (Wallich) Makino	90.8337	29.9331	70.0808	123.918	12	24	Liliaceae	Lilieae	Gao et al., 2012
Cardiocrinum giganteum (Wallich) Makino	90.4318	29.3267	70.1133	118.55	12	24	Liliaceae	Lilieae	Gao et al., 2012
Cardiocrinum giganteum (Wallich) Makino	88.6147	26.1115	68.8063	120.433	12	24	Liliaceae	Lilieae	Gao et al., 2012
Cardiocrinum giganteum (Wallich) Makino	84.0888	23.1408	68.2513	116.013	12	24	Liliaceae	Lilieae	Gao et al., 2012
Lilium ‘almaata’ B552 Oriental hybrid	81.15	22.44	68.3728	145.78	12	24	Liliaceae	Lilieae	Marasek and Orlikowska, 2003
	79.87	23.17	66.5649	137.53	12	24	Liliaceae	Lilieae	Marasek and Orlikowska, 2003
	77.49	25.23	77.6449	128.21	12	24	Liliaceae	Lilieae	Marasek and Orlikowska, 2003
Lilium ‘expression’ Oriental hybrid	84.72	27.37	68.0717	141.58	12	24	Liliaceae	Lilieae	Marasek and Orlikowska, 2003
	82.12	31.47	65.7865	128.15	12	24	Liliaceae	Lilieae	Marasek and Orlikowska, 2003
	80.04	31.92	63.4812	123.68	12	24	Liliaceae	Lilieae	Marasek and Orlikowska, 2003
Lilium ‘ormolongi’ Oriental hybrid	88.7	21.02	73.1669	186.09	12	24	Liliaceae	Lilieae	Marasek and Orlikowska, 2003
	84.76	24.05	70.6931	167.89	12	24	Liliaceae	Lilieae	Marasek and Orlikowska, 2003
	80.97	28.2	67.5481	148.96	12	24	Liliaceae	Lilieae	Marasek and Orlikowska, 2003
Lilium ‘marcopolo’ Oriental hybrid	82.29	29.7	59.5978	165.75	12	24	Liliaceae	Lilieae	Marasek and Orlikowska, 2003
	80.48	21.35	56.7894	154.58	12	24	Liliaceae	Lilieae	Marasek and Orlikowska, 2003
	78.25	33.56	53.2689	142.47	12	24	Liliaceae	Lilieae	Marasek and Orlikowska, 2003
Lilium ‘muscadet’ Oriental hybrid	78.9	22.65	68.9365	129.47	12	24	Liliaceae	Lilieae	Marasek and Orlikowska, 2003
	77.68	23.53	66.6783	120.31	12	24	Liliaceae	Lilieae	Marasek and Orlikowska, 2003
	76.56	24.93	63.581	110.06	12	24	Liliaceae	Lilieae	Marasek and Orlikowska, 2003
Lilium ‘stargazer’ Oriental hybrid	82.7	24.72	65.0594	168.18	12	24	Liliaceae	Lilieae	Marasek and Orlikowska, 2003
	87.34	22.03	72.8972	224.01	12	24	Liliaceae	Lilieae	Marasek and Orlikowska, 2003
	74.98	32.15	57.0122	134.63	12	24	Liliaceae	Lilieae	Marasek and Orlikowska, 2003
Lilium amabile Palib.	76.74	21.52	65.8887	233.24	12	24	Liliaceae	Lilieae	Stewart, 1947
	83.31	24.5	67.0388	169.28	12	24	Liliaceae	Lilieae	Smyth et al., 1989
Lilium auratum Lindl.	86.67	26.68	68.1283	205.9	12	24	Liliaceae	Lilieae	Stewart, 1947
	84.79	24.8	68.4648	205.23	12	24	Liliaceae	Lilieae	Stewart, 1947
	85.25	26.67	69.073	195.31	12	24	Liliaceae	Lilieae	Stewart, 1947
	85.78	24.3	67.358	168.79	12	24	Liliaceae	Lilieae	Smyth et al., 1989
Lilium bakerianum Collett & Hemsl.	49.17	22.34	56.3709	123	12	24	Liliaceae	Lilieae	Wang et al., 1993
L. bosniacum (Beck) Fritsch	80.84	23.36	68.59	174.08	12	24	Liliaceae	Lilieae	Muratovic et al., 2005
L. brownii F. E. Br.	87.65	27.66	69.7629	92.4	12	24	Liliaceae	Lilieae	Xie et al., 1992
L. callosum Siebold & Zucc.	83.15	21.86	68.9167	207.97	12	24	Liliaceae	Lilieae	Stewart, 1947
L. canadense L.	100	22.03	71.0681	215.39	12	24	Liliaceae	Lilieae	Stewart, 1947
	67.92	22.63	64.7953	194.87	12	24	Liliaceae	Lilieae	Smyth et al., 1989
L. candidum L.	82.54	17.88	72.6615	151.49	12	24	Liliaceae	Lilieae	Marasek and Orlikowska, 2003
	81.47	18.88	70.813	140.78	12	24	Liliaceae	Lilieae	Marasek and Orlikowska, 2003
	81.45	19.02	68.6226	130.59	12	24	Liliaceae	Lilieae	Marasek and Orlikowska, 2003
	81.53	17.76	67.0898	234.72	12	24	Liliaceae	Lilieae	Stewart, 1947
	69.59	18.55	66.5868	166.2	12	24	Liliaceae	Lilieae	Smyth et al., 1989
L. carniolicum Bernh.	64.03	28.92	62.612	154.12	12	24	Liliaceae	Lilieae	Siljak-Yakovev et al., 2003
	91.57	21.56	72.8065	120.36	12	24	Liliaceae	Lilieae	Zucconi, 1956
L. catesbaei Walter	79.7	19.1	66.746	217.97	12	24	Liliaceae	Lilieae	Stewart, 1947
L. columbianum Leichtlin	97.44	19.91	73.5343	250.36	12	24	Liliaceae	Lilieae	Stewart, 1947
L. concolor Salisb.	79.09	21.67	66.197	221.66	12	24	Liliaceae	Lilieae	Stewart, 1947
	78.74	20.46	66.197	226.29	12	24	Liliaceae	Lilieae	Stewart, 1947
	78.24	20.46	65.726	226.29	12	24	Liliaceae	Lilieae	Stewart, 1947
	83.3	23.98	66.3556	180.04	12	24	Liliaceae	Lilieae	Smyth et al., 1989
L. davidi Duch.	75.38	21.34	66.008	234.61	12	24	Liliaceae	Lilieae	Stewart, 1947
L. duchartrei Franch.	80.62	28.49	67.436	216.03	12	24	Liliaceae	Lilieae	Stewart, 1947
L. formosanum Wallace	77.04	23.73	68.2683	237.88	12	24	Liliaceae	Lilieae	Stewart, 1947
	64.37	23.54	65.8398	169.1	12	24	Liliaceae	Lilieae	Smyth et al., 1989
	49.09	35.87	61.067	108.26	12	24	Liliaceae	Lilieae	Sato, 1943
L. grayi S. Watson	79	18.7	67.8294	251.14	12	24	Liliaceae	Lilieae	Stewart, 1947
L. hansonii Leichtlin	70.39	22.62	64.1456	192.5	12	24	Liliaceae	Lilieae	Smyth et al., 1989
L. henrici Franch.	48.52	15.05	57.199	127.2	12	24	Liliaceae	Lilieae	Wang et al., 1993
L. henryi Baker	87.8	23.54	72.7858	158.61	12	24	Liliaceae	Lilieae	Marasek and Orlikowska, 2003
	85.73	25.21	70.9548	146.28	12	24	Liliaceae	Lilieae	Marasek and Orlikowska, 2003
	83.62	27.43	68.2474	132.11	12	24	Liliaceae	Lilieae	Marasek and Orlikowska, 2003
	93.19	26.25	70.0431	206.38	12	24	Liliaceae	Lilieae	Stewart, 1947
	91.11	24.3	69.8182	210.16	12	24	Liliaceae	Lilieae	Stewart, 1947
	57.8594	19.7077	64.9127	118.897	12	24	Liliaceae	Lilieae	Mehra and Kachroo, 1951
	79.53	27.44	65.7893	191.7	12	24	Liliaceae	Lilieae	Smyth et al., 1989
L. japonicum Thunb.	86.26	22	67.5034	219.7	12	24	Liliaceae	Lilieae	Stewart, 1947
L. lancifolium Thunb. (sub L. tigrinum)	70.622	23.6471	61.9471	138.214	12	24	Liliaceae	Lilieae	Mehra and Kachroo, 1951
(sub L. tigrinum)	80.6844	22.4748	69.6825	169.013	12	36	Liliaceae	Lilieae	Noda, 1955
(sub L. tigrinum)	69.13	30.57	65.3389	176.5	12	24	Liliaceae	Lilieae	Smyth et al., 1989
L. lankongense Franch.	64.33	23.33	65.7166	169.53	12	24	Liliaceae	Lilieae	Smyth et al., 1989
L. leichtlinii Hook. f.	80.12	27.18	68.3073	242.47	12	24	Liliaceae	Lilieae	Stewart, 1947
L. leucanthum (Baker) Baker	95.56	25.23	67.8537	231.95	12	24	Liliaceae	Lilieae	Stewart, 1947
L. longiflorum Thunb.	79.11	23.19	69.4165	239.57	12	24	Liliaceae	Lilieae	Stewart, 1947
	56.1778	21.7356	56.8698	95.5724	12	24	Liliaceae	Lilieae	Mehra and Kachroo, 1951
	64.51	24.69	66.3236	168.5	12	24	Liliaceae	Lilieae	Smyth et al., 1989
	63.74	19.68	65.1838	292.06	12	24	Liliaceae	Lilieae	Lim et al., 2001
L. mackliniae Sealy	63.07	19.54	65.9943	164.13	12	24	Liliaceae	Lilieae	Smyth et al., 1989
L. martagon L.	77.88	21.46	67.7686	249.84	12	24	Liliaceae	Lilieae	Stewart, 1947
	76.31	23.73	67.0234	195.52	12	24	Liliaceae	Lilieae	Smyth et al., 1989
L. maximowiczii Regel	88.368	26.2421	67.4634	196.267	12	24	Liliaceae	Lilieae	Noda, 1955
L. michauxii Poir. (sub L. carolinianum)	72.35	17.85	63.9966	204.96	12	24	Liliaceae	Lilieae	Stewart, 1947
L. michiganense Farw.	93.69	20.07	72.9324	250.67	12	24	Liliaceae	Lilieae	Stewart, 1947
L. monadelphum M. Bieb.	83.07	21.08	66.2538	210.94	12	24	Liliaceae	Lilieae	Stewart, 1947
L. nepalense D. Don	68.05	23.08	65.4	95.38	12	24	Liliaceae	Lilieae	Xie et al., 1992
	47.9844	21.792	56.4261	144.959	12	24	Liliaceae	Lilieae	Mehra and Kachroo, 1951
L. occidentale Purdy	102.61	20.01	74.7767	235.33	12	24	Liliaceae	Lilieae	Stewart, 1947
L. pardalinum Kellogg	112.89	19.69	75.382	237.3	12	24	Liliaceae	Lilieae	Stewart, 1947
	103.2	17.56	73.15	229.82	12	24	Liliaceae	Lilieae	Stewart, 1947
	65.57	22.07	63.0341	180.21	12	24	Liliaceae	Lilieae	Smyth et al., 1989
(sub L. roezlii)	103.9	21.6	73.5141	198.63	12	24	Liliaceae	Lilieae	Stewart, 1947
L. parryi S. Watson	107.03	18.48	74.2491	244.46	12	24	Liliaceae	Lilieae	Stewart, 1947
L. pensylvanicum Ker-Gawl. (sub L. dauricum)	79.34	23.53	68.11	221.51	12	24	Liliaceae	Lilieae	Stewart, 1947
L. philadelphicum L.	84.27	20	71.6489	192.23	12	24	Liliaceae	Lilieae	Stewart, 1947
L. polyphyllum D. Don	66.35	22.2	67.2229	158.4	12	24	Liliaceae	Lilieae	Mehra and Sachdeva, 1976
L. amabile Palibin	82.86	23.5	70	170.644	12	24	Liliaceae	Lilieae	Gao et al., 2012
L. anhuiense D. C. Zhang & J. Z. Shao	81.5477	27.9002	70.5112	116.114	12	24	Liliaceae	Lilieae	Gao et al., 2012
L. bakerianum var. delavayi (Franchet)E. H. Wilson	73.3597	20.9482	65.9435	159.572	12	24	Liliaceae	Lilieae	Gao et al., 2012
L. bakerianum var. rubrum Stearn	78.9262	25.4309	69.7379	145.141	12	24	Liliaceae	Lilieae	Gao et al., 2012
L. brownii var. viridulum Baker	79.3186	22.5081	68.0269	131.212	12	24	Liliaceae	Lilieae	Gao et al., 2012
L. brownii var. viridulum Baker	82.88	22.6	70	149.066	12	24	Liliaceae	Lilieae	Gao et al., 2012
L. brownii var. viridulum Baker	77.1567	23.6115	68.4039	165.205	12	24	Liliaceae	Lilieae	Gao et al., 2012
L. brownii var. viridulum Baker	83.5688	24.4909	70.7028	198.247	12	24	Liliaceae	Lilieae	Gao et al., 2012
L. carniolicum Bernh.	68.236	30.4726	65.2945	164.766	12	24	Liliaceae	Lilieae	Siljak-Yakovev et al., 2003
L. cernuum Komarov	92.3	19.5203	70.2448	173.474	12	24	Liliaceae	Lilieae	Gao et al., 2012
L. columbianum Leichtlin	74.1931	20.2425	67.7711	167.257	12	24	Liliaceae	Lilieae	Gao et al., 2012
L. concolor var. pulchellum (Fischer) Regel	80.46	20.36	70	159.002	12	24	Liliaceae	Lilieae	Gao et al., 2012
L. dauricum Ker Gawler	80.0949	20.6373	69.1227	158.589	12	24	Liliaceae	Lilieae	Gao et al., 2012
L. davidii var. davidii Duchartre ex Elwes	77.79	21.89	68	161.062	12	24	Liliaceae	Lilieae	Gao et al., 2012
L. davidii var. davidii Duchartre ex Elwes	75.6394	22.3242	68.2901	189.28	12	24	Liliaceae	Lilieae	Gao et al., 2012
L. davidii var. davidii Duchartre ex Elwes	80.2513	25.425	70.2328	229.731	12	24	Liliaceae	Lilieae	Gao et al., 2012
L. distichum Nakai ex Kamibayashi	84.773	23.181	68.6075	207.361	12	24	Liliaceae	Lilieae	Gao et al., 2012
L. duchartrei Franchet	78.3994	22.1555	60.7208	178.74	12	24	Liliaceae	Lilieae	Gao et al., 2012
L. duchartrei Franchet	75.9885	21.8506	68.1013	136.713	12	24	Liliaceae	Lilieae	Gao et al., 2012
L. duchartrei Franchet	75.42	24.44	69	131.128	12	24	Liliaceae	Lilieae	Gao et al., 2012
L. duchartrei Franchet	72.81	23.98	67	119.582	12	24	Liliaceae	Lilieae	Gao et al., 2012
L. duchartrei Franchet	74.1542	21.795	68.9282	156.281	12	24	Liliaceae	Lilieae	Gao et al., 2012
L. duchartrei Franchet	70.8398	21.7552	65.7835	172.861	12	24	Liliaceae	Lilieae	Gao et al., 2012
L. duchartrei Franchet	75.6394	22.3242	68.2901	148.53	12	24	Liliaceae	Lilieae	Gao et al., 2012
L. duchartrei Franchet	74.1542	21.795	68.9282	160.325	12	24	Liliaceae	Lilieae	Gao et al., 2012
L. fargesii Franchet	92.3008	19.4956	70	145.639	12	24	Liliaceae	Lilieae	Gao et al., 2012
L. grayi S. Watson	67.5236	19.1018	65.068	165.826	12	24	Liliaceae	Lilieae	Gao et al., 2012
L. henrici Franch.	76.1134	17.8859	69.8323	140.695	12	24	Liliaceae	Lilieae	Gao et al., 2012
L. henryi Baker	82.1004	21.4668	69.8394	134.69	12	24	Liliaceae	Lilieae	Gao et al., 2012
L. lankongense Franchet	76.29	20.81	67	143.632	12	24	Liliaceae	Lilieae	Gao et al., 2012
L. lankongense Franchet	68.5992	20.7682	65.6847	173.202	12	24	Liliaceae	Lilieae	Gao et al., 2012
L. leucanthum var. centifolium (Stapf ex Elwes) Stearn	77.65	24.04	69	149.679	12	24	Liliaceae	Lilieae	Gao et al., 2012
L. leucanthum var. leucanthum Baker	82.88	22.6	70	151.189	12	24	Liliaceae	Lilieae	Gao et al., 2012
L. leucanthum var. leucanthum Baker	82.1398	21.659	69.7523	138.536	12	24	Liliaceae	Lilieae	Gao et al., 2012
L. lijiangense L. J. Peng	92.3008	19.4956	70.2584	133.78	12	24	Liliaceae	Lilieae	Gao et al., 2012
L. longiflorum Thunb. var. scabrum Masam.	79.1316	21.1457	69.9186	156.401	12	24	Liliaceae	Lilieae	Gao et al., 2012
L. lophophorum (Bureau & Franchet) Franchet	52.29	19.04	62	147.943	12	24	Liliaceae	Lilieae	Gao et al., 2012
L. lophophorum (Bureau & Franchet) Franchet	71.0532	21.3225	67.3237	155.696	12	24	Liliaceae	Lilieae	Gao et al., 2012
L. lophophorum (Bureau & Franchet) Franchet	60.6057	17.0463	63.3931	156.351	12	24	Liliaceae	Lilieae	Gao et al., 2012
L. martagon Linnaeus var. pilosiusculum Freyn	78.2332	25.0353	69.8906	214.124	12	24	Liliaceae	Lilieae	Gao et al., 2012
L. martagon Linnaeus var. pilosiusculum Freyn	83.7575	22.0207	69.0295	198.34	12	24	Liliaceae	Lilieae	Gao et al., 2012
L. matangense J.M.Xu	78.4	18.53	61	134.364	12	24	Liliaceae	Lilieae	Gao et al., 2012
L. nanum Klotzsch in Klotzsch & Garcke	53.5076	17.1172	62.6783	154.69	12	24	Liliaceae	Lilieae	Gao et al., 2012
L. parryi S. Watson	86.6997	17.6372	70.1067	164.153	12	24	Liliaceae	Lilieae	Stewart, 1947
L. pomponium L.	65.9444	22.2893	66.7713	184.659	12	24	Liliaceae	Lilieae	Siljak-Yakovev et al., 2003
L. primulinum var. burmanicum (W. W. Smith) Stearn	92.3008	19.4956	70.2584	141.093	12	24	Liliaceae	Lilieae	Gao et al., 2012
L. primulinum var. ochraceum (Franchet) Stearn	71.38	26.37	66	148.789	12	24	Liliaceae	Lilieae	Gao et al., 2012
L. pumilum Delile	66.56	31.72	64.4973	131.45	12	24	Liliaceae	Lilieae	Stewart, 1947
L. pumilum Delile	77.23	23.74	65.0758	145.45	12	24	Liliaceae	Lilieae	Stewart, 1947
L. pumilum Delile	69	24.02	65.715	136.46	12	24	Liliaceae	Lilieae	Stewart, 1947
L. pyrenaicum Gouan	63.8561	27.0035	65.4966	171.378	12	24	Liliaceae	Lilieae	Siljak-Yakovev et al., 2003
L. regale E. H. Wilson	79.42	22.22	69	158.796	12	24	Liliaceae	Lilieae	Gao et al., 2012
L. regale E. H. Wilson	80.3221	21.3886	69.2669	159.697	12	24	Liliaceae	Lilieae	Gao et al., 2012
L. regale E. H. Wilson	85.0789	22.4211	70.6728	160.43	12	24	Liliaceae	Lilieae	Gao et al., 2012
L. sargentiae E. H. Wilson	79.3941	21.0688	67.3489	182.183	12	24	Liliaceae	Lilieae	Gao et al., 2012
L. sargentiae E. H. Wilson	87.5571	23.2233	70.6582	197.056	12	24	Liliaceae	Lilieae	Gao et al., 2012
L. sargentiae E. H. Wilson	80.1535	23.8358	70.4757	175.634	12	24	Liliaceae	Lilieae	Gao et al., 2012
L. sargentiae E. H. Wilson	76.3098	21.7772	68.3316	137.349	12	24	Liliaceae	Lilieae	Gao et al., 2012
L. sempervivoideum H. Léveillé	81.5964	28.1596	67.4843	167.375	12	24	Liliaceae	Lilieae	Gao et al., 2012
L. speciosum Thunberg var. gloriosoides Baker	72.6475	22.889	63.8483	191.839	12	24	Liliaceae	Lilieae	Stewart, 1947
L. sulphureum Baker	92.3008	19.4956	70.2584	133.731	12	24	Liliaceae	Lilieae	Gao et al., 2012
L. taliense Franch.	76.61	22.16	67	135.026	12	24	Liliaceae	Lilieae	Gao et al., 2012
L. taliense Franch.	72.0894	20.2476	68	134.67	12	24	Liliaceae	Lilieae	Gao et al., 2012
L. taliense Franch.	64.3267	21.2774	66.3239	133.769	12	24	Liliaceae	Lilieae	Gao et al., 2012
L. tigrinum Ker Gawler	83.09	22.79	69	139.6	12	36	Liliaceae	Lilieae	Gao et al., 2012
L. tigrinum Ker Gawler	79.1721	21.2345	69.9732	162.337	12	36	Liliaceae	Lilieae	Gao et al., 2012
L. wenshanense L. J. Peng & F. X. Li	78.9262	25.4309	69.7379	154.938	12	24	Liliaceae	Lilieae	Gao et al., 2012
Lilium sp.	75.4468	20.6229	69.3887	144.79	12	24	Liliaceae	Lilieae	Gao et al., 2012
Notholirion bulbuliferum (Lingelsheim ex H. Limpricht) Stearn	68.43	22.85	70	111.67	12	24	Liliaceae	Lilieae	Gao et al., 2012
Notholirion bulbuliferum (Lingelsheim ex H. Limpricht) Stearn	79.4743	24.72	72.4668	117.304	12	24	Liliaceae	Lilieae	Gao et al., 2012
Notholirion bulbuliferum (Lingelsheim ex H. Limpricht) Stearn	75.064	25.35	72.75	121.709	12	24	Liliaceae	Lilieae	Gao et al., 2012
Notholirion bulbuliferum (Lingelsheim ex H. Limpricht) Stearn	79.6522	22.416	71.34	129.177	12	24	Liliaceae	Lilieae	Gao et al., 2012
Notholirion marcophyllum (D. Don)Boissier	74.756	20.48	73	110.27	12	24	Liliaceae	Lilieae	Gao et al., 2012
Notholirion campanulatum Cotton & Stearn	45.55	21.06	56.98	109.4	12	24	Liliaceae	Lilieae	Wang et al., 1993
Nomocharis aperta (Franchet) E. H. Wilson	82.6793	23.8337	68.6268	132.512	12	24	Liliaceae	Lilieae	Gao et al., 2012
Nomocharis aperta (Franchet) E. H. Wilson	76.3169	22.839	69.2494	124.844	12	24	Liliaceae	Lilieae	Gao et al., 2012
Nomocharis aperta (Franchet) E. H. Wilson	78.3384	23.1125	70.2727	130.89	12	24	Liliaceae	Lilieae	Gao et al., 2012
Nomocharis farreri (W. E. Evans) Harrow	82.3345	24.437	67.5259	145.074	12	24	Liliaceae	Lilieae	Gao et al., 2012
Nomocharis meleagrina Franchet	78.2918	24.4453	68.3736	120.465	12	24	Liliaceae	Lilieae	Gao et al., 2012
Nomocharis saluenensis I.B. Balfour	76.8877	21.9338	68.6283	103.833	12	24	Liliaceae	Lilieae	Gao et al., 2012
Nomocharis aperta (Franch.) W. W. Sm. & W. E. Evans	74.29	24.75	65.91	95.28	12	24	Liliaceae	Lilieae	Xie et al., 1992
Nomocharis basilissa Farrer	50.19	33.77	66.49	96.04	12	24	Liliaceae	Lilieae	Xie et al., 1992
	66.9	24.19	68.18	95.116	12	24	Liliaceae	Lilieae	Xie et al., 1992
Nomocharis farreri (W. E. Evans) Cox	75.21	26.42	68.4	93.56	12	24	Liliaceae	Lilieae	Xie et al., 1992
Nomocharis meleagrina Franch.	84.88	22.85	68.97	94.36	12	24	Liliaceae	Lilieae	Xie et al., 1992
(sub N. bilouensis)	49.28	20.59	58.94	111	12	24	Liliaceae	Lilieae	Wang et al., 1993
Nomocharis pardanthina Franch.	51.23	19.48	59.88	113.3	12	24	Liliaceae	Lilieae	Wang et al., 1993
	88.14	25.16	70.05	103.19	12	24	Liliaceae	Lilieae	Xie et al., 1992
	72.13	23.02	65.75	94.76	12	24	Liliaceae	Lilieae	Xie et al., 1992
Nomocharis sauluensis Balf. f.	54.49	19.47	56.76	109.3	12	24	Liliaceae	Lilieae	Wang et al., 1993
Nomocharis pardanthina Franchet	76.0576	27.2661	69.1285	130.882	12	24	Liliaceae	Lilieae	Gao et al., 2012
Clintonia andrewsiana Torr.	32.24	35.13	34.9402	67.19	7	28	Liliaceae	Medeoleae	Nakamura et al., 1987
	26.47	27.39	30.5637	65.4	7	28	Liliaceae	Medeoleae	Utech, 1975
Clintonia borealis (Sol.) Raf.	28.59	28.2	29.9448	74.035	7	28	Liliaceae	Medeoleae	Nakamura et al., 1987
	27.9	29.85	33.5241	73.1	7	28	Liliaceae	Medeoleae	Kapoor, 1973
Clintonia udensis Trautv. & C. A. Mey	20.76	22.58	23.0174	115.84	7	14	Liliaceae	Medeoleae	Wang et al., 1993
	28.32	25.04	29.8555	71.55	7	28	Liliaceae	Medeoleae	Nakamura et al., 1987
	19.01	29.56	20.29	67.005	7	28	Liliaceae	Medeoleae	Nakamura et al., 1987
	23.18	24.64	29.5244	72.29	7	28	Liliaceae	Medeoleae	Utech and Suda, 1975
	35.87	25.19	30.5678	38.35	7	28	Liliaceae	Medeoleae	Sato, 1943
C. umbellulata (Michx.) Morong	28.86	27.1	33.4884	77.695	7	28	Liliaceae	Medeoleae	Nakamura et al., 1987
	25.86	23.48	31.2115	73.03	7	28	Liliaceae	Medeoleae	Utech, 1975
Clintonia uniflora (Menzies) Kunth	26.95	26.94	32.3621	68.01	7	28	Liliaceae	Medeoleae	Nakamura et al., 1987
	24.8	23.18	28.4929	70.3	7	28	Liliaceae	Medeoleae	Utech, 1975
Medeola virginiana L.	34.69	33.9	22.9114	90.89	7	14	Liliaceae	Medeoleae	Stewart and Bamford, 1942
Streptopus amplexifolius (L.) DC.	18.29	24.93	34.6681	27.4	8	32	Liliaceae	Streptopeae	Bent and Smith, 1969
	34.45	35.67	34.2691	16.32	8	32	Liliaceae	Streptopeae	Therman, 1956
	24.82	36.34	30.8492	17.17	8	32	Liliaceae	Streptopeae	Sato, 1943
Streptopus lanceolatus (Aiton) Reveal (sub S. roseus)	19.91	25.34	27.1912	28.9	8	16	Liliaceae	Streptopeae	Bent and Smith, 1969
Streptopus simplex D. Don	20.17	42.07	22.2343	22.78	7	14	Liliaceae	Streptopeae	Zhang et al., 2005
	35.05	40.66	32.1704	19.99	8	16	Liliaceae	Streptopeae	Ting et al., 2005
	26.09	36.7	39.9673	29.55	8	16	Liliaceae	Streptopeae	Ting et al., 2005
Prosartes hookeri Torr.	38.54	26.12	35.2414	39.71	9	18	Liliaceae	Streptopeae	Tamura et al., 1992
Prosartes lanuginosa (Michx.) D. Don	22.29	35.48	24.2065	35.23	9	18	Liliaceae	Streptopeae	Tamura et al., 1992
Prosartes maculata (Buckley) A. Gray	33.54	22.1	32.3632	24.3	6	12	Liliaceae	Streptopeae	Tamura et al., 1992
Prosartessmithi (Hook) Utech	24.51	34.64	16.2415	26.363	8	16	Liliaceae	Streptopeae	Tamura et al., 1992
	21.84	26.18	20.4871	26.2158	8	16	Liliaceae	Streptopeae	Tamura et al., 1992
Scoliopus bigelowii Torr.	29.72	20.08	26.9237	78.27	8	16	Liliaceae	Streptopeae	Johansen, 1932
Tricyrtis affinis Makino	36.43	35.8	33.3549	59.4167	13	26	Liliaceae	Tricyrrtideae	Nakamura, 1968
	31.78	38.12	26.815	39.34	13	26	Liliaceae	Tricyrrtideae	Sato, 1939
Tricyrtis flava Maxim.	33.58	32.53	32.544	53.2167	13	26	Liliaceae	Tricyrrtideae	Nakamura, 1968
Tricyrtis formosana Baker	34.11	35.87	28.2808	50.75	13	26	Liliaceae	Tricyrrtideae	Sato, 1939
	20.63	34.05	21.9678	28.1	13	26	Liliaceae	Tricyrrtideae	Nakamura, 1968
	27.68	32.43	25.7788	36.91	13	26	Liliaceae	Tricyrrtideae	Sato, 1943
Tricyrtis hirta (Thunb.) Hook.	28.7	25.51	31.983	57.64	13	26	Liliaceae	Tricyrrtideae	Nakamura, 1968
	18.25	32.97	25.8296	38.39	13	26	Liliaceae	Tricyrrtideae	Sato, 1939
	30.13	35.72	32.564	37.12	13	26	Liliaceae	Tricyrrtideae	Sato, 1939
	33.09	21.13	32.4501	70.8543	13	26	Liliaceae	Tricyrrtideae	Sato, 1939
	26.51	40.78	29.5884	36.85	13	26	Liliaceae	Tricyrrtideae	Sato, 1939
	24.89	36.45	34.3059	35.46	13	26	Liliaceae	Tricyrrtideae	Sato, 1939
Tricyrtis lasiocarpa Matsum.	27.97	41.53	26.2939	39.04	13	26	Liliaceae	Tricyrrtideae	Sato, 1939
Tricyrtis latifolia Maxim.	31.49	26.73	27.5962	51.4833	13	26	Liliaceae	Tricyrrtideae	Nakamura, 1968
	28.51	35.91	32.448	35.27	13	26	Liliaceae	Tricyrrtideae	Sato, 1939
Tricyrtis macrantha Maxim.	31.03	42.73	28.162	48.3444	13	26	Liliaceae	Tricyrrtideae	Nakamura, 1968
	26.51	40.78	29.5884	36.85	13	26	Liliaceae	Tricyrrtideae	Sato, 1939
	24.27	27.86	26.7479	34.69	13	26	Liliaceae	Tricyrrtideae	Sato, 1939
	24.05	38.31	27.0119	32.47	13	26	Liliaceae	Tricyrrtideae	Sato, 1939
Tricyrtis macranthopsis Masam.	22.29	33.96	23.837	38.47	13	26	Liliaceae	Tricyrrtideae	Sato, 1939
	30.11	28.45	23.3183	36.74	13	26	Liliaceae	Tricyrrtideae	Sato, 1939
Tricyrtis macropoda Miq.	30.91	24.74	32.6556	47.3778	13	26	Liliaceae	Tricyrrtideae	Nakamura, 1968
Tricyrtis nana Yatabe	28.85	34.35	40.727	73.1389	13	26	Liliaceae	Tricyrrtideae	Nakamura, 1968
Tricyrtis ohsumiensis Masam.	32.53	23	32.4203	53.4667	13	26	Liliaceae	Tricyrrtideae	Nakamura, 1968
Tricyrtisperfoliata Masam.	27.94	28.21	34.388	45.9889	13	26	Liliaceae	Tricyrrtideae	Nakamura, 1968
	24.05	28.19	27.0343	29.38	13	26	Liliaceae	Tricyrrtideae	Sato, 1939
Tricyrtis stolonifera Matsum.	27.96	32.73	26.0468	34.1	13	26	Liliaceae	Tricyrrtideae	Sato, 1939
Calochortus albus (Benth.) Douglas	38.35	19.12	48.96	26.1	10	20	Liliaceae	Calochorteae	Beal, 1939
Calochortus amabilis Purdy	62.27	18.85	50.39	21.31	10	20	Liliaceae	Calochorteae	Newton, 1925
Calochortus ambiguus (M. E. Jones) Ownbey	73.26	25.97	55	28.99	9	18	Liliaceae	Calochorteae	Beal and Ownbey, 1943
Calochortus monophyllus (Lindl.) Lem. (sub C. benthami)	55.75	16.38	41.77	21.17	10	20	Liliaceae	Calochorteae	Newton, 1925
Calochortus catalinae S. Watson	49.6	35.03	37.28	20.04	7	14	Liliaceae	Calochorteae	Newton, 1925
Calochortus elegans Pursh	48.06	21.9	46.05	36.04	10	20	Liliaceae	Calochorteae	Beal, 1939
Calochortus elegans var. nanus Alph. Wood.	31.99	19.93	36.22	30.94	10	20	Liliaceae	Calochorteae	Beal and Ownbey, 1943
Calochortus flexuosus S. Watson	32.52	31.24	37.84	26.09	7	14	Liliaceae	Calochorteae	Beal and Ownbey, 1943
Calochortus gunnisonii S. Watson	62.06	22.09	57.54	32.2	9	18	Liliaceae	Calochorteae	Beal, 1939
Calochortus kennedyi Porter	66.43	20.8	54.27	26.79	8	16	Liliaceae	Calochorteae	Beal and Ownbey, 1943
Calochortus longibarbatus S. Watson	36.69	22.22	48.01	41.9	10	20	Liliaceae	Calochorteae	Beal and Ownbey, 1943
Calochortus longibarbatus S. Watson	75.08	26.56	61.51	26.8299	10	30	Liliaceae	Calochorteae	Beal and Ownbey, 1943
Calochortus luteus Douglas	50.18	23.64	40.41	33.8	7	14	Liliaceae	Calochorteae	Beal, 1939
Calochortus macrocarpus Douglas	60.68	21.99	59.97	41.18	7	14	Liliaceae	Calochorteae	Beal, 1939
Calochortus nitidus Douglas	48.93	23.27	56.12	32.29	10	20	Liliaceae	Calochorteae	Beal, 1939
Calochortus nudus S. Watson	45.64	28.27	53.81	25.88	10	20	Liliaceae	Calochorteae	Beal, 1939
Calochortus nuttallii Torr. & A. Gray	71.38	21.77	50.47	36	8	16	Liliaceae	Calochorteae	Beal, 1939
Calochortus palmeri S. Watson	39.23	20.57	53.89	25.24	7	14	Liliaceae	Calochorteae	Beal and Ownbey, 1943
Calochortus plummerae Greene	43.71	46.05	57.77	29.76	9	18	Liliaceae	Calochorteae	Beal, 1939
Calochortus plummerae Greene	46.05	42.8	50.28	17.01	9	18	Liliaceae	Calochorteae	Newton, 1925
Calochortus superbus Purdy	35.93	17.51	28.66	38.9	6	12	Liliaceae	Calochorteae	Beal, 1939
Calochortus umpquahensis Fredricks	66.54	50.36	60.12	83.25	10	20	Liliaceae	Calochorteae	Fredericks, 1989
Calochortus uniflorus Hook. & Arn.	37.71	27.2	35.44	25.73	10	40	Liliaceae	Calochorteae	Sato, 1943
Calochortus venustus Douglas	51.2	15.49	48.6	38.24	7	14	Liliaceae	Calochorteae	Beal, 1939
Calochortus vestae (Purdy) Purdy	33.55	32.38	49.99	16.7	7	28	Liliaceae	Calochorteae	Newton, 1925
Smilax aspera L.	36.53	38.92	56.35	59.1	16	32	Smilacaceae		Vijayavalli and Mathew, 1989
Smilax aspera L.	37.37	32.09	41.81	33.88	16	32	Smilacaceae		Marchi, 1971
Smilax bracteata C. Presl	32.62	35.82	57.65	45.35	16	32	Smilacaceae		Vijayavalli and Mathew, 1989
Smilax china L.	26.3	39.99	39.4	35.83	15	60	Smilacaceae		Sato, 1943
Smilax davidiana A. DC.	27.3	30.64	46.18	37.81	16	32	Smilacaceae		Fu and Hong, 1990
Smilax davidiana A. DC.	21.29	32.46	50.6	35.81	16	32	Smilacaceae		Fu and Hong, 1990
Smilax discostis Warb.	23.65	55.5	34.48	78.93	16	32	Smilacaceae		Shang et al., 1992
Smilax glabra Roxb.	20.88	35.63	54.03	35.94	16	32	Smilacaceae		Fu and Hong, 1990
Smilax nervomarginata Hayata	20.46	47.49	47.71	34.84	16	32	Smilacaceae		Fu and Hong, 1990
Smilax nipponica Miq.	32.42	36.98	37.91	36.48	13	26	Smilacaceae		Fu and Hong, 1990
Smilax nipponica Miq.	24.72	35.01	38.86	68.1795	16	32	Smilacaceae		Fu and Hong, 1990
Smilax nipponica Miq.	17.58	34.96	36.61	50.37	16	32	Smilacaceae		Fu and Hong, 1990
Smilax ovalifolia Roxb.	45.03	40.2	48.42	50.56	16	64	Smilacaceae		Vijayavalli and Mathew, 1989
Smilax ovalifolia Roxb.	24.57	41.58	56.4	46.55	16	128	Smilacaceae		Vijayavalli and Mathew, 1989
Smilax ovalifolia Roxb.	28.64	39.72	52.77	34.17	16	96	Smilacaceae		Vijayavalli and Mathew, 1989
Smilax riparia A. DC.	26.46	34.81	41.02	37.33	15	30	Smilacaceae		Fu and Hong, 1990
Smilax riparia A. DC.	26.3	32.43	39.25	51.96	15	30	Smilacaceae		Fu and Hong, 1990
Smilax wightii A. DC.	33.01	44.21	54.9	38.71	16	32	Smilacaceae		Vijayavalli and Mathew, 1989
Smilax zeylanica L.	36.87	42.29	54.53	79.15	16	32	Smilacaceae		Vijayavalli and Mathew, 1990
Smilax rufescens	34.57	27.09	52.71	54.24	16	32	Smilacaceae		Pizzaia et al., 2013
Smilax discostis Warb.	56.28	31.72	40.94	50.91	16	32	Smilacaceae		Zong Yan et al., 1992
Smilax austro-zhejiangensis Q. Lin	22.09	14.9	12.85	56.57	16	32	Smilacaceae		Hang-Hui et al., 2007
Smilax bockii Warb.	29.27	13.06	13.93	57.54	16	32	Smilacaceae		Hang-Hui et al., 2007
Smilax china L.	30.82	15.76	26.53	56.61	16	64	Smilacaceae		Hang-Hui et al., 2007
Smilax china L.	22.12	21.75	24.77	62.56	16	32	Smilacaceae		Hang-Hui et al., 2007
Smilax chingii Wang & Tang	26.29	17.1	20.13	60.94	16	32	Smilacaceae		Hang-Hui et al., 2007
Smilax guiyangensis C. X. Fu & C. D.Shen	28.77	14.76	16.61	59.27	16	32	Smilacaceae		Hang-Hui et al., 2007
Smilax lebrunii Lévl.	26.02	13.1	44.93	57.86	16	48	Smilacaceae		Hang-Hui et al., 2007
Smilax lunglingensisWang & Tang	23.64	12.14	13.82	57.51	16	32	Smilacaceae		Hang-Hui et al., 2007
Smilax polycephala Wang & Tang	24.98	14.09	15.31	57.47	16	32	Smilacaceae		Hang-Hui et al., 2007
Smilax riparia A. DC.	22.68	16.82	20.95	60.14	16	32	Smilacaceae		Hang-Hui et al., 2007
Smilax scobinicaulis C. H. Wright	19.12	15.49	19.16	59.63	16	32	Smilacaceae		Hang-Hui et al., 2007
Smilax stans Maxim.	27.76	21.91	20.3	61.37	16	32	Smilacaceae		Hang-Hui et al., 2007
Smilax trinervula Miq.	22.33	14.78	17.24	58.92	16	32	Smilacaceae		Hang-Hui et al., 2007
Smilax umbrosa J.M.Xu	30.3	15.18	17.31	58.86	16	32	Smilacaceae		Hang-Hui et al., 2007

## Sheet: Cyananthus
Cyananthus Wall. ex Benth.
Species	Section	CVCL	CVCI	MCA	THL	x	2n	Reference
C. hookeri C.B.Clarke	Annui	43.19	15.28	43	64.08	6	24	Chen et al., 2014
C. hookeri C.B.Clarke	Annui	40.53	19.29	41	55.92	6	24	Chen et al., 2014
C. hookeri C.B.Clarke	Annui	41.22	16.93	41	56.4	6	24	Chen et al., 2014
C. hookeri C.B.Clarke	Annui	37.45	20.41	37	27.84	6	12	Chen et al., 2014
C. lichiangensis W.W.Sm.	Annui	18.63	18.34	19	31.5	7	14	Chen et al., 2014
C. lichiangensis W.W.Sm.	Annui	22.41	19.5	22	30.94	7	14	Chen et al., 2014
C. inflatus Hook.f. & Thoms.	Annui	28.16	17.82	28	38.36	7	14	Chen et al., 2014
C. inflatus Hook.f. & Thoms.	Annui	22.45	18.1	22	35.84	7	14	Chen et al., 2014
C. inflatus Hook.f. & Thoms.	Annui	26.54	15.66	27	63	7	28	Chen et al., 2014
C. inflatus Hook.f. & Thoms.	Annui	28.35	19	28	71.4	7	28	Chen et al., 2014
C. macrocalyx Franch.	Stenolobi	28.62	23.85	29	29.9	5	10	Chen et al., 2014
C. macrocalyx Franch.	Stenolobi	42.96	21.64	43	30.7	5	10	Chen et al., 2014
C. dolichosceles Marq.	Stenolobi	30.49	18.49	30	23.4	5	10	Chen et al., 2014
C. incanus Hook.f. & Thoms.	Stenolobi	34.95	14.65	35	35.5	5	10	Chen et al., 2014
C. incanus Hook.f. & Thoms.	Stenolobi	34.94	14.96	35	33.1	5	10	Chen et al., 2014
C. petiolatus Franch.	Stenolobi	36.89	19.37	37	31.9	5	10	Chen et al., 2014
C. flavus Marq.	Stenolobi	41.32	16.97	41	38.76	6	12	Chen et al., 2014
C. longiflorus Franch.	Stenolobi	43.16	17.19	43	37.2	6	12	Chen et al., 2014
C. delavayi Franch.	Stenolobi	35.03	15.54	35	38.28	6	12	Chen et al., 2014
C. formosus Diels	Stenolobi	38.78	22.5	39	38.52	6	12	Chen et al., 2014
C. lobatus Wall. ex Benth.	Cyananthus	29.82	23.43	30	56.98	7	14	Chen et al., 2014
C. microphyllus Edgew.	Cyananthus	35.79	19.48	36	48.02	7	14	Chen et al., 2014
C. cordifolius Duthie	Cyananthus	32.35	30.43	32	49.98	7	14	Chen et al., 2014
C. pedunculatus C.B.Clarke	Cyananthus	34.18	25.56	34	53.2	7	14	Chen et al., 2014
Chen GF, Sun WG, Hong DY, Zhou Z, Niu Y, Nie ZL, Sun H, Zhang JW, Li ZM. 2014. Systematic significance of cytology in Cyananthus (Campanulaceae) endemic to the Sino-Himalayan region. Journal of Systematics and Evolution 52: 260–270.

## Sheet: Crocus ser. Verni
Crocus L. ser. Verni B.Mathew
Species	CVCL	CVCI	MCA	THL	x	2n	Reference
C. etruscus Parl.	51.36	37.33	23.75	28.46	4	8	Harpke et al., 2014
C. heuffelianus Herb.	29.65	39.87	33.36	23.66	5	10	Harpke et al., 2014
C. heuffelianus Herb.	35.76	31.63	32.57	33.53	5	10	Harpke et al., 2014
C. heuffelianus Herb.	32.39	35.28	31.08	36.87	5	10	Harpke et al., 2014
C. heuffelianus Herb.	22.96	17.88	25.56	24.3	6	12	Harpke et al., 2014
C. heuffelianus Herb.	28.93	24.78	24.66	37.68	6	18	Harpke et al., 2014
C. heuffelianus Herb.	33.5	26.5	25.33	36.14	6	18	Harpke et al., 2014
C. heuffelianus Herb.	25.19	27.67	32.45	54.57	6	18	Harpke et al., 2014
C. heuffelianus Herb.	27.94	26.84	32.22	44.62	6	18	Harpke et al., 2014
C. heuffelianus Herb.	35.88	33.21	28.92	50.57	6	18	Harpke et al., 2014
C. ilvensis Peruzzi & Carta	38.1	28.51	26.15	24.65	4	8	Harpke et al., 2014
C. ilvensis Peruzzi & Carta	49.52	33.24	29.4	21.8	4	8	Harpke et al., 2014
C. ilvensis Peruzzi & Carta	59.06	27.7	26.19	27.89	4	8	Harpke et al., 2014
C. ilvensis Peruzzi & Carta	49.45	28.45	27.25	24.47	4	8	Harpke et al., 2014
C. kosaninii Pulević	24.05	28.38	35.15	30.55	7	14	Harpke et al., 2014
C. neapolitanus (Ker Gawl.) Loisel.	15.24	24.4	18.46	25.77	4	8	Harpke et al., 2014
C. neapolitanus (Ker Gawl.) Loisel.	11.47	26.26	12.13	26	4	8	Harpke et al., 2014
C. neapolitanus (Ker Gawl.) Loisel.	10.08	18.8	7.21	20	4	8	Harpke et al., 2014
C. neapolitanus (Ker Gawl.) Loisel.	9.59	22.39	11.92	27.7	4	8	Harpke et al., 2014
C. neapolitanus (Ker Gawl.) Loisel.	14.5	22.11	15.84	26.2	4	8	Harpke et al., 2014
C. neapolitanus (Ker Gawl.) Loisel.	23.12	31.75	31.99	18.23	4	8	Harpke et al., 2014
C. neglectus Peruzzi & Carta	43.08	24.3	32.95	51.28	4	16	Harpke et al., 2014
C. neglectus Peruzzi & Carta	45.7	34.36	31.23	59.32	4	16	Harpke et al., 2014
C. neglectus Peruzzi & Carta	51.83	17.51	14.48	63.61	4	16	Harpke et al., 2014
C. neglectus Peruzzi & Carta	47.93	32.2	19.11	43.3	4	16	Harpke et al., 2014
C. neglectus Peruzzi & Carta	68.16	32.06	23.91	34.89	4	16	Harpke et al., 2014
C. siculus Tineo	10.07	24.89	17.07	28.73	4	8	Harpke et al., 2014
C. siculus Tineo	19.78	21.87	14.07	24.1	4	8	Harpke et al., 2014
C. siculus Tineo	11.67	20.7	12.14	29	4	8	Harpke et al., 2014
C. tommasinianus Herb.	38.56	20.13	40.69	31.4	4	16	Harpke et al., 2014
C. tommasinianus Herb.	27.2	8.04	42.96	30.89	4	16	Harpke et al., 2014
C. tommasinianus Herb.	27.03	13.76	33.33	25.82	4	16	Harpke et al., 2014
C. vernus (L.) Hill	18.32	22.97	29.5	27.54	4	8	Harpke et al., 2014
C. vernus (L.) Hill	19.3	19.49	34.78	28.29	4	8	Harpke et al., 2014
C. vernus (L.) Hill	19.61	20.81	20.82	27.29	4	8	Harpke et al., 2014
C. vernus (L.) Hill	37.62	21.3	28.77	25.11	4	8	Harpke et al., 2014
Harpke D, Carta A, Tomović G, Ranđelović V, Ranđelović N, Blattner FR, Peruzzi L. 2014. Phylogeny, karyotype evolution and taxonomy of Crocus ser. Verni (Iridaceae). Plant Systematics and Evolution: in press DOI 10.1007/s00606-014-1074-0.
